# Supplementary material for: Biological Machine Learning Combined with Campylobacter Population Genomics Reveals Virulence Gene Allelic Variants Cause Disease
Source: PubMed Central journal article supplement (PMC7232492; doi:10.3390/microorganisms8040549), 2020-04-10
Supplement: microorganisms-08-00549-s001.pdf [file microorganisms-08-00549-s001.pdf]

Table S1. Ranked allelic variants using BioML.

| Rank | allele         | relative importance | scaled importance | percentage |
|------|----------------|---------------------|-------------------|------------|
| 1    | porA_507/1275  | 89.41               | 1                 | 0.0048     |
| 2    | porA_513/1275  | 89.39               | 0.9998            | 0.0048     |
| 3    | porA_1099/1275 | 86.78               | 0.9706            | 0.0046     |
| 4    | porA_651/1275  | 86.28               | 0.965             | 0.0046     |
| 5    | porA_803/1275  | 86.02               | 0.9621            | 0.0046     |
| 6    | porA_394/1275  | 85.31               | 0.9542            | 0.0045     |
| 7    | porA_592/1275  | 84.53               | 0.9455            | 0.0045     |
| 8    | porA_548/1275  | 83.56               | 0.9346            | 0.0044     |
| 9    | porA_445/1275  | 83.19               | 0.9304            | 0.0044     |
| 10   | proS_1373/1707 | 83.12               | 0.9297            | 0.0044     |
| 11   | porA_562/1275  | 82.20               | 0.9194            | 0.0044     |
| 12   | porA_435/1275  | 82.00               | 0.9171            | 0.0044     |
| 13   | porA_372/1275  | 81.52               | 0.9117            | 0.0043     |
| 14   | porA_580/1275  | 81.20               | 0.9082            | 0.0043     |
| 15   | porA_400/1275  | 81.16               | 0.9077            | 0.0043     |
| 16   | porA_250/1275  | 79.46               | 0.8887            | 0.0042     |
| 17   | porA_459/1275  | 79.24               | 0.8863            | 0.0042     |
| 18   | ubiE_2_255/774 | 78.06               | 0.8731            | 0.0042     |
| 19   | kpsM_157/783   | 77.53               | 0.8672            | 0.0041     |
| 20   | hemL_762/1275  | 77.09               | 0.8623            | 0.0041     |
| 21   | proS_1512/1707 | 76.92               | 0.8603            | 0.0041     |
| 22   | sdhA_1599/1836 | 76.42               | 0.8548            | 0.0041     |
| 23   | ackA_1114/1191 | 76.41               | 0.8547            | 0.0041     |
| 24   | kpsD_1065/1659 | 76.37               | 0.8542            | 0.0041     |
| 25   | porA_411/1275  | 75.90               | 0.8489            | 0.004      |
| 26   | tatC_94/738    | 75.65               | 0.8461            | 0.004      |
| 27   | proS_67/1707   | 75.64               | 0.846             | 0.004      |
| 28   | nrdA_315/2370  | 75.14               | 0.8405            | 0.004      |
| 29   | kpsD_55/1659   | 75.04               | 0.8393            | 0.004      |
| 30   | ubiD_1006/1803 | 74.66               | 0.8351            | 0.004      |
| 31   | nrdA_333/2370  | 74.22               | 0.8302            | 0.004      |
| 32   | dnaJ_318/1122  | 74.21               | 0.8301            | 0.0039     |
| 33   | hisG_453/900   | 73.89               | 0.8264            | 0.0039     |
| 34   | proS_1614/1707 | 73.59               | 0.823             | 0.0039     |
| 35   | proS_1594/1707 | 73.58               | 0.8229            | 0.0039     |
| 36   | proS_1364/1707 | 72.98               | 0.8163            | 0.0039     |
| 37   | pnp_1347/2160  | 72.97               | 0.8162            | 0.0039     |
| 38   | dnaJ_950/1122  | 72.97               | 0.8161            | 0.0039     |

|    |                  |       |        |        |
|----|------------------|-------|--------|--------|
| 39 | purB_1071/1329   | 72.89 | 0.8153 | 0.0039 |
| 40 | nadE_653/741     | 72.89 | 0.8152 | 0.0039 |
| 41 | ppiB_288/483     | 72.56 | 0.8115 | 0.0039 |
| 42 | ispB_118/894     | 72.35 | 0.8093 | 0.0039 |
| 43 | purB_1304/1329   | 72.28 | 0.8085 | 0.0038 |
| 44 | purB_1167/1329   | 72.27 | 0.8084 | 0.0038 |
| 45 | pnp_930/2160     | 72.26 | 0.8083 | 0.0038 |
| 46 | pheT_268/2322    | 71.34 | 0.7979 | 0.0038 |
| 47 | pheT_218/2322    | 71.33 | 0.7978 | 0.0038 |
| 48 | ruvC_342/555     | 71.32 | 0.7977 | 0.0038 |
| 49 | ruvC_324/555     | 71.02 | 0.7943 | 0.0038 |
| 50 | mdtJ_198/342     | 69.96 | 0.7825 | 0.0037 |
| 51 | cfiB_194/1446    | 69.95 | 0.7824 | 0.0037 |
| 52 | pseG_341/825     | 69.95 | 0.7823 | 0.0037 |
| 53 | ttcA_621/756     | 69.24 | 0.7744 | 0.0037 |
| 54 | ahpC_397/597     | 68.39 | 0.765  | 0.0036 |
| 55 | ackA_165/1191    | 68.25 | 0.7634 | 0.0036 |
| 56 | arsB_327/1287    | 68.02 | 0.7608 | 0.0036 |
| 57 | dnaJ_522/1122    | 68.01 | 0.7607 | 0.0036 |
| 58 | purQ_425/672     | 67.80 | 0.7583 | 0.0036 |
| 59 | ttcA_715/756     | 67.63 | 0.7564 | 0.0036 |
| 60 | kpsD_498/1659    | 67.62 | 0.7563 | 0.0036 |
| 61 | porA_642/1275    | 67.59 | 0.756  | 0.0036 |
| 62 | ahpC_444/597     | 67.24 | 0.752  | 0.0036 |
| 63 | porA_541/1275    | 67.22 | 0.7518 | 0.0036 |
| 64 | rimO_629/1320    | 66.53 | 0.7442 | 0.0035 |
| 65 | rimO_429/1320    | 66.52 | 0.7441 | 0.0035 |
| 66 | flaA_1_1581/1719 | 66.51 | 0.744  | 0.0035 |
| 67 | mdtJ_280/342     | 66.42 | 0.7429 | 0.0035 |
| 68 | nth_2_165/687    | 66.24 | 0.7409 | 0.0035 |
| 69 | glgC_2_590/762   | 66.09 | 0.7392 | 0.0035 |
| 70 | arsB_726/1287    | 66.02 | 0.7384 | 0.0035 |
| 71 | arsB_661/1287    | 65.96 | 0.7378 | 0.0035 |
| 72 | arsB_636/1287    | 65.96 | 0.7377 | 0.0035 |
| 73 | arsB_608/1287    | 65.95 | 0.7376 | 0.0035 |
| 74 | fumC_657/1392    | 65.75 | 0.7355 | 0.0035 |
| 75 | nrdA_1317/2370   | 65.60 | 0.7337 | 0.0035 |
| 76 | glgC_2_372/762   | 65.28 | 0.7302 | 0.0035 |
| 77 | ruvC_337/555     | 65.28 | 0.7301 | 0.0035 |
| 78 | pcaB_78/1368     | 65.11 | 0.7283 | 0.0035 |

|     |                 |       |        |        |
|-----|-----------------|-------|--------|--------|
| 79  | kdsD_294/948    | 65.08 | 0.7279 | 0.0035 |
| 80  | ahpC_558/597    | 64.67 | 0.7233 | 0.0034 |
| 81  | ahpC_264/597    | 64.66 | 0.7232 | 0.0034 |
| 82  | nrdA_1206/2370  | 64.48 | 0.7212 | 0.0034 |
| 83  | parB_429/837    | 64.45 | 0.7208 | 0.0034 |
| 84  | proC_652/732    | 64.44 | 0.7208 | 0.0034 |
| 85  | parB_414/837    | 64.44 | 0.7207 | 0.0034 |
| 86  | parB_333/837    | 64.43 | 0.7207 | 0.0034 |
| 87  | mnmG_1578/1860  | 64.42 | 0.7206 | 0.0034 |
| 88  | cfiB_954/1446   | 64.41 | 0.7205 | 0.0034 |
| 89  | arsB_291/1287   | 64.40 | 0.7203 | 0.0034 |
| 90  | arsB_137/1287   | 64.39 | 0.7202 | 0.0034 |
| 91  | flaA_2_870/1719 | 63.95 | 0.7153 | 0.0034 |
| 92  | ttuB_870/1233   | 63.36 | 0.7087 | 0.0034 |
| 93  | thiG_428/777    | 63.24 | 0.7073 | 0.0034 |
| 94  | rimO_1063/1320  | 63.24 | 0.7073 | 0.0034 |
| 95  | thiG_272/777    | 63.23 | 0.7072 | 0.0034 |
| 96  | nrdA_1053/2370  | 63.23 | 0.7072 | 0.0034 |
| 97  | nrdA_1047/2370  | 63.22 | 0.7071 | 0.0034 |
| 98  | dksA_57/363     | 63.21 | 0.707  | 0.0034 |
| 99  | rlmB_577/684    | 63.11 | 0.7059 | 0.0034 |
| 100 | mnmG_1764/1860  | 63.08 | 0.7055 | 0.0034 |
| 101 | arsB_276/1287   | 63.07 | 0.7054 | 0.0034 |
| 102 | thiG_243/777    | 62.90 | 0.7035 | 0.0033 |
| 103 | mnmG_1347/1860  | 62.83 | 0.7027 | 0.0033 |
| 104 | mdtI_74/309     | 62.82 | 0.7027 | 0.0033 |
| 105 | kdpC_363/411    | 62.81 | 0.7026 | 0.0033 |
| 106 | kdpC_180/411    | 62.80 | 0.7025 | 0.0033 |
| 107 | birA_402/654    | 62.80 | 0.7024 | 0.0033 |
| 108 | kdsD_153/948    | 62.63 | 0.7005 | 0.0033 |
| 109 | fmt_293/918     | 62.57 | 0.6999 | 0.0033 |
| 110 | fmt_375/918     | 61.96 | 0.693  | 0.0033 |
| 111 | lpxC_270/885    | 61.80 | 0.6912 | 0.0033 |
| 112 | dapE_897/1098   | 61.66 | 0.6897 | 0.0033 |
| 113 | argS_1197/1593  | 61.43 | 0.6871 | 0.0033 |
| 114 | mnmG_1521/1860  | 61.42 | 0.687  | 0.0033 |
| 115 | mnmG_1476/1860  | 61.42 | 0.6869 | 0.0033 |
| 116 | mnmG_1455/1860  | 61.41 | 0.6868 | 0.0033 |
| 117 | ackA_807/1191   | 61.40 | 0.6868 | 0.0033 |
| 118 | mnmG_1437/1860  | 61.40 | 0.6868 | 0.0033 |

|     |                  |       |        |        |
|-----|------------------|-------|--------|--------|
| 119 | arsB_450/1287    | 61.39 | 0.6867 | 0.0033 |
| 120 | ackA_825/1191    | 61.39 | 0.6866 | 0.0033 |
| 121 | thiD_520/813     | 61.34 | 0.6861 | 0.0033 |
| 122 | citN_821/1347    | 60.91 | 0.6813 | 0.0032 |
| 123 | recN_540/1524    | 60.71 | 0.6791 | 0.0032 |
| 124 | argD_625/1182    | 60.70 | 0.679  | 0.0032 |
| 125 | parB_63/837      | 60.54 | 0.6771 | 0.0032 |
| 126 | korA_822/1125    | 60.53 | 0.677  | 0.0032 |
| 127 | recN_738/1524    | 60.52 | 0.6769 | 0.0032 |
| 128 | prmC_345/816     | 60.38 | 0.6753 | 0.0032 |
| 129 | nrdA_357/2370    | 60.37 | 0.6752 | 0.0032 |
| 130 | htpX_974/1188    | 60.36 | 0.6751 | 0.0032 |
| 131 | dltA_403/1509    | 60.35 | 0.675  | 0.0032 |
| 132 | mnmG_669/1860    | 59.73 | 0.6681 | 0.0032 |
| 133 | dapE_1065/1098   | 59.69 | 0.6677 | 0.0032 |
| 134 | hemC_750/924     | 59.64 | 0.6671 | 0.0032 |
| 135 | thiG_331/777     | 59.58 | 0.6664 | 0.0032 |
| 136 | thiD_580/813     | 59.57 | 0.6663 | 0.0032 |
| 137 | glgC_2_282/762   | 59.56 | 0.6662 | 0.0032 |
| 138 | ackA_789/1191    | 59.50 | 0.6655 | 0.0032 |
| 139 | arsB_796/1287    | 59.50 | 0.6655 | 0.0032 |
| 140 | arsB_715/1287    | 59.49 | 0.6654 | 0.0032 |
| 141 | arsB_616/1287    | 59.48 | 0.6653 | 0.0032 |
| 142 | rscC_2238/2310   | 59.11 | 0.6612 | 0.0031 |
| 143 | pleD_81/1245     | 59.10 | 0.6611 | 0.0031 |
| 144 | yrdA_405/549     | 59.10 | 0.661  | 0.0031 |
| 145 | pleD_585/1245    | 59.10 | 0.661  | 0.0031 |
| 146 | cydB_373/1125    | 59.09 | 0.6609 | 0.0031 |
| 147 | recN_51/1524     | 59.09 | 0.6609 | 0.0031 |
| 148 | infA_80/219      | 59.09 | 0.6609 | 0.0031 |
| 149 | copA_1_1610/2352 | 59.08 | 0.6609 | 0.0031 |
| 150 | infA_33/219      | 59.08 | 0.6608 | 0.0031 |
| 151 | argH_1045/1383   | 59.08 | 0.6608 | 0.0031 |
| 152 | ftsA_501/1383    | 59.07 | 0.6607 | 0.0031 |
| 153 | soj_435/786      | 58.97 | 0.6596 | 0.0031 |
| 154 | soj_123/786      | 58.97 | 0.6596 | 0.0031 |
| 155 | soj_351/786      | 58.96 | 0.6595 | 0.0031 |
| 156 | queE_385/744     | 58.96 | 0.6595 | 0.0031 |
| 157 | soj_325/786      | 58.96 | 0.6594 | 0.0031 |
| 158 | porA_187/1275    | 58.95 | 0.6594 | 0.0031 |

|     |                 |       |        |        |
|-----|-----------------|-------|--------|--------|
| 159 | birA_603/654    | 58.95 | 0.6594 | 0.0031 |
| 160 | soj_144/786     | 58.95 | 0.6593 | 0.0031 |
| 161 | mntB_678/804    | 58.95 | 0.6593 | 0.0031 |
| 162 | atpC_183/390    | 58.94 | 0.6593 | 0.0031 |
| 163 | fmt_867/918     | 58.94 | 0.6592 | 0.0031 |
| 164 | aspS_250/1752   | 58.94 | 0.6592 | 0.0031 |
| 165 | fabF_189/1215   | 58.93 | 0.6591 | 0.0031 |
| 166 | aat_2116/2130   | 58.93 | 0.6591 | 0.0031 |
| 167 | aspS_706/1752   | 58.83 | 0.658  | 0.0031 |
| 168 | aspS_687/1752   | 58.82 | 0.6579 | 0.0031 |
| 169 | soj_387/786     | 58.81 | 0.6578 | 0.0031 |
| 170 | sucD_606/870    | 58.71 | 0.6567 | 0.0031 |
| 171 | sucD_537/870    | 58.70 | 0.6566 | 0.0031 |
| 172 | sucD_624/870    | 58.70 | 0.6565 | 0.0031 |
| 173 | pal_20/498      | 58.69 | 0.6565 | 0.0031 |
| 174 | sucD_613/870    | 58.69 | 0.6564 | 0.0031 |
| 175 | mutS2_378/2208  | 58.69 | 0.6564 | 0.0031 |
| 176 | lpxC_633/885    | 58.68 | 0.6563 | 0.0031 |
| 177 | recN_1225/1524  | 58.58 | 0.6552 | 0.0031 |
| 178 | dcuB_136/1425   | 58.50 | 0.6544 | 0.0031 |
| 179 | sucD_408/870    | 58.50 | 0.6543 | 0.0031 |
| 180 | dcuB_102/1425   | 58.50 | 0.6543 | 0.0031 |
| 181 | rpoN_565/1251   | 58.49 | 0.6542 | 0.0031 |
| 182 | clpB_675/2574   | 58.49 | 0.6542 | 0.0031 |
| 183 | flaA_2_742/1719 | 58.48 | 0.6541 | 0.0031 |
| 184 | flaA_2_723/1719 | 58.42 | 0.6534 | 0.0031 |
| 185 | rlmB_276/684    | 58.19 | 0.6509 | 0.0031 |
| 186 | feoB_1098/1842  | 58.18 | 0.6508 | 0.0031 |
| 187 | aer_1_65/498    | 58.15 | 0.6504 | 0.0031 |
| 188 | aer_1_21/498    | 58.14 | 0.6503 | 0.0031 |
| 189 | flaA_2_826/1719 | 57.92 | 0.6478 | 0.0031 |
| 190 | rocA_2252/3489  | 57.72 | 0.6456 | 0.0031 |
| 191 | uvrB_189/1974   | 57.53 | 0.6434 | 0.0031 |
| 192 | yycB_1045/1164  | 57.52 | 0.6433 | 0.0031 |
| 193 | uvrB_1704/1974  | 57.52 | 0.6433 | 0.0031 |
| 194 | yajR_935/1296   | 57.51 | 0.6433 | 0.0031 |
| 195 | uvrB_1513/1974  | 57.51 | 0.6432 | 0.0031 |
| 196 | tolB_212/1209   | 57.51 | 0.6432 | 0.0031 |
| 197 | uvrB_943/1974   | 57.50 | 0.6432 | 0.0031 |
| 198 | uvrB_120/1974   | 57.50 | 0.6431 | 0.0031 |

|     |                   |       |        |        |
|-----|-------------------|-------|--------|--------|
| 199 | tolB_132/1209     | 57.50 | 0.6431 | 0.0031 |
| 200 | uvrB_1089/1974    | 57.49 | 0.6431 | 0.0031 |
| 201 | sucC_48/1164      | 57.49 | 0.643  | 0.0031 |
| 202 | rpoBC_2_3641/4554 | 57.49 | 0.643  | 0.0031 |
| 203 | ttcA_105/756      | 57.49 | 0.643  | 0.0031 |
| 204 | sucC_237/1164     | 57.48 | 0.6429 | 0.0031 |
| 205 | rhaM_131/318      | 57.48 | 0.6429 | 0.0031 |
| 206 | rpsA_110/1671     | 57.48 | 0.6429 | 0.0031 |
| 207 | proP_4_560/1296   | 57.47 | 0.6428 | 0.0031 |
| 208 | moaA_201/963      | 57.47 | 0.6428 | 0.0031 |
| 209 | rpoBC_2_3850/4554 | 57.47 | 0.6428 | 0.0031 |
| 210 | proP_2_1116/1362  | 57.47 | 0.6428 | 0.0031 |
| 211 | mnmA_1_845/1017   | 57.46 | 0.6427 | 0.0031 |
| 212 | plsY_460/609      | 57.46 | 0.6427 | 0.0031 |
| 213 | mdh_633/903       | 57.46 | 0.6426 | 0.0031 |
| 214 | kdpD_30/1821      | 57.45 | 0.6426 | 0.0031 |
| 215 | murD_1080/1209    | 57.45 | 0.6426 | 0.0031 |
| 216 | kdpD_702/1821     | 57.45 | 0.6426 | 0.0031 |
| 217 | kdpD_1798/1821    | 57.45 | 0.6425 | 0.0031 |
| 218 | kdpD_559/1821     | 57.44 | 0.6425 | 0.0031 |
| 219 | kdpB_948/2046     | 57.44 | 0.6424 | 0.0031 |
| 220 | icd2_390/2205     | 57.44 | 0.6424 | 0.0031 |
| 221 | kdpD_4/1821       | 57.43 | 0.6424 | 0.0031 |
| 222 | kdpB_1874/2046    | 57.43 | 0.6424 | 0.0031 |
| 223 | htpX_655/1188     | 57.43 | 0.6423 | 0.0031 |
| 224 | kdpB_1391/2046    | 57.42 | 0.6423 | 0.0031 |
| 225 | htpX_143/1188     | 57.42 | 0.6422 | 0.0031 |
| 226 | frdC_727/783      | 57.42 | 0.6422 | 0.0031 |
| 227 | icd2_700/2205     | 57.42 | 0.6422 | 0.0031 |
| 228 | hisS_1012/1227    | 57.41 | 0.6422 | 0.0031 |
| 229 | ffh_428/1338      | 57.41 | 0.6421 | 0.0031 |
| 230 | gpml_506/1479     | 57.41 | 0.6421 | 0.0031 |
| 231 | dsbL_1_78/360     | 57.40 | 0.6421 | 0.0031 |
| 232 | btuD_1_265/855    | 57.40 | 0.642  | 0.0031 |
| 233 | fusA_1331/2076    | 57.40 | 0.642  | 0.0031 |
| 234 | dnaE_3535/3603    | 57.40 | 0.642  | 0.0031 |
| 235 | atpC_290/390      | 57.39 | 0.6419 | 0.0031 |
| 236 | copA_1_1242/2352  | 57.39 | 0.6419 | 0.0031 |
| 237 | atpC_253/390      | 57.39 | 0.6419 | 0.0031 |
| 238 | clpA_1936/2130    | 57.38 | 0.6418 | 0.0031 |

|     |                   |       |        |        |
|-----|-------------------|-------|--------|--------|
| 239 | argC_58/1029      | 57.38 | 0.6418 | 0.0031 |
| 240 | ccpA_24/1026      | 57.38 | 0.6418 | 0.0031 |
| 241 | atoC_1248/1302    | 57.38 | 0.6418 | 0.0031 |
| 242 | aas_3474/3513     | 57.38 | 0.6417 | 0.0031 |
| 243 | aroA_66/1287      | 57.37 | 0.6417 | 0.0031 |
| 244 | aroA_36/1287      | 57.36 | 0.6416 | 0.0031 |
| 245 | uvrB_1866/1974    | 57.20 | 0.6398 | 0.003  |
| 246 | murC_1290/1299    | 57.20 | 0.6397 | 0.003  |
| 247 | lpxC_483/885      | 57.19 | 0.6396 | 0.003  |
| 248 | kdpB_674/2046     | 57.19 | 0.6396 | 0.003  |
| 249 | kdpD_615/1821     | 57.18 | 0.6395 | 0.003  |
| 250 | kdpB_1818/2046    | 57.18 | 0.6395 | 0.003  |
| 251 | kdpD_1593/1821    | 57.17 | 0.6395 | 0.003  |
| 252 | kdpB_1614/2046    | 57.17 | 0.6394 | 0.003  |
| 253 | kdpB_1063/2046    | 57.17 | 0.6394 | 0.003  |
| 254 | kdpB_723/2046     | 57.16 | 0.6394 | 0.003  |
| 255 | kdpB_1494/2046    | 57.16 | 0.6393 | 0.003  |
| 256 | htpX_399/1188     | 57.16 | 0.6393 | 0.003  |
| 257 | kdpB_1453/2046    | 57.15 | 0.6392 | 0.003  |
| 258 | kdpB_1139/2046    | 57.14 | 0.6392 | 0.003  |
| 259 | tmk_380/579       | 57.10 | 0.6386 | 0.003  |
| 260 | dcuB_24/1425      | 57.09 | 0.6385 | 0.003  |
| 261 | pfs_528/687       | 57.04 | 0.638  | 0.003  |
| 262 | kdpA_1_179/261    | 57.03 | 0.6379 | 0.003  |
| 263 | eptA_1119/1539    | 56.94 | 0.6369 | 0.003  |
| 264 | cfiB_237/1446     | 56.90 | 0.6364 | 0.003  |
| 265 | thiG_474/777      | 56.86 | 0.636  | 0.003  |
| 266 | mnmA_1_426/1017   | 56.86 | 0.636  | 0.003  |
| 267 | flaA_2_855/1719   | 56.45 | 0.6313 | 0.003  |
| 268 | flaA_2_819/1719   | 56.44 | 0.6313 | 0.003  |
| 269 | aer_1_234/498     | 56.43 | 0.6312 | 0.003  |
| 270 | ackA_456/1191     | 56.09 | 0.6273 | 0.003  |
| 271 | yafP_79/459       | 55.94 | 0.6257 | 0.003  |
| 272 | flaA_2_1554/1719  | 55.93 | 0.6256 | 0.003  |
| 273 | dapA_1_162/909    | 55.92 | 0.6255 | 0.003  |
| 274 | atpD_1_437/522    | 55.92 | 0.6254 | 0.003  |
| 275 | thiG_171/777      | 55.86 | 0.6248 | 0.003  |
| 276 | smpB_189/453      | 55.85 | 0.6247 | 0.003  |
| 277 | yflS_134/168      | 55.85 | 0.6246 | 0.003  |
| 278 | rpoBC_1_4034/4128 | 55.84 | 0.6246 | 0.003  |

|     |                  |       |        |       |
|-----|------------------|-------|--------|-------|
| 279 | gppA_2_197/975   | 55.84 | 0.6246 | 0.003 |
| 280 | tsf_246/1074     | 55.84 | 0.6246 | 0.003 |
| 281 | kgtP_424/1260    | 55.84 | 0.6245 | 0.003 |
| 282 | glyS_1573/1995   | 55.84 | 0.6245 | 0.003 |
| 283 | hom_842/1248     | 55.83 | 0.6244 | 0.003 |
| 284 | glmU_27/1290     | 55.83 | 0.6244 | 0.003 |
| 285 | aas_2194/3513    | 55.83 | 0.6244 | 0.003 |
| 286 | hom_589/1248     | 55.82 | 0.6244 | 0.003 |
| 287 | dapE_717/1098    | 55.82 | 0.6243 | 0.003 |
| 288 | aas_1587/3513    | 55.82 | 0.6243 | 0.003 |
| 289 | carB_1236/3270   | 55.81 | 0.6243 | 0.003 |
| 290 | bioB_183/837     | 55.80 | 0.6242 | 0.003 |
| 291 | mog_477/543      | 55.78 | 0.6239 | 0.003 |
| 292 | copA_1_837/2352  | 55.78 | 0.6239 | 0.003 |
| 293 | copA_1_783/2352  | 55.77 | 0.6238 | 0.003 |
| 294 | bamA_294/2220    | 55.77 | 0.6237 | 0.003 |
| 295 | copA_1_1335/2352 | 55.76 | 0.6237 | 0.003 |
| 296 | bamA_279/2220    | 55.76 | 0.6237 | 0.003 |
| 297 | clpA_1341/2130   | 55.75 | 0.6236 | 0.003 |
| 298 | atpC_102/390     | 55.75 | 0.6236 | 0.003 |
| 299 | birA_348/654     | 55.74 | 0.6235 | 0.003 |
| 300 | asd_867/1032     | 55.74 | 0.6235 | 0.003 |

---



Table S2. Metadata for extraintestinal *Campylobacter jejuni*.

| Strain Name | Host  | Disease  | Sources          | Region | Year | Clone SA* | ST | Accession      |
|-------------|-------|----------|------------------|--------|------|-----------|----|----------------|
| CA6e        | Sheep | Abortion | Aborted placenta | CA,USA | 1991 | Yes       | 8  | SRR309440<br>0 |
| CA7e        | Sheep | Abortion | Aborted placenta | CA,USA | 1992 | Yes       | 8  | SRR309440<br>1 |
| ID1         | Sheep | Abortion | Aborted placenta | ID,USA | 1992 | Yes       | 8  | SRR309440<br>2 |
| CA8e        | Sheep | Abortion | Aborted placenta | CA,USA | 1993 | Yes       | 8  | SRR309440<br>3 |
| ID12        | Sheep | Abortion | Aborted placenta | ID,USA | 1993 | Yes       | 8  | SRR309440<br>4 |
| ID15        | Sheep | Abortion | Aborted placenta | ID,USA | 1993 | Yes       | 8  | SRR309440<br>5 |
| ID28        | Sheep | Abortion | Aborted placenta | ID,USA | 1993 | Yes       | 8  | SRR309440<br>6 |
| ID31        | Sheep | Abortion | Aborted placenta | ID,USA | 1993 | Yes       | 8  | SRR309440<br>7 |
| ID34        | Sheep | Abortion | Aborted placenta | ID,USA | 1993 | Yes       | 8  | SRR309440<br>8 |
| CA3e        | Sheep | Abortion | Aborted placenta | CA,USA | 1999 | Yes       | 8  | SRR309441<br>9 |
| CA4e        | Sheep | Abortion | Aborted placenta | CA,USA | 1999 | Yes       | 8  | SRR309441<br>0 |
| CA5e        | Sheep | Abortion | Aborted placenta | CA,USA | 2000 | Yes       | 8  | SRR309441<br>1 |
| VDL705      | Sheep | Abortion | Aborted placenta | IA,USA | 2003 | Yes       | 8  | SRR309441<br>2 |
| VLD698      | Sheep | Abortion | Aborted placenta | IA,USA | 2003 | Yes       | 8  | SRR309441<br>3 |
| CA7         | Sheep | Abortion | Aborted placenta | CA,USA | 2003 | Yes       | 8  | SRR309441<br>4 |
| ID18107     | Sheep | Abortion | Aborted placenta | ID,USA | 2004 | Yes       | 8  | SRR309441<br>5 |
| 7-B         | Sheep | Abortion | Aborted placenta | ID,USA | 2004 | Yes       | 8  | SRR309441<br>6 |
| ID32314     | Sheep | Abortion | Aborted placenta | ID,USA | 2004 | Yes       | 8  | SRR309441<br>7 |
| 7-F         | Sheep | Abortion | Aborted placenta | ID,USA | 2004 | Yes       | 8  | SRR309441<br>8 |
| VDL5908     | Sheep | Abortion | Aborted placenta | IA,USA | 2004 | Yes       | 8  | SRR309441<br>9 |
| VDL3842     | Sheep | Abortion | Aborted placenta | IA,USA | 2004 | Yes       | 8  | SRR309441<br>0 |
| CA5         | Sheep | Abortion | Aborted placenta | CA,USA | 2004 | Yes       | 8  | SRR309441<br>1 |
| CA8         | Sheep | Abortion | Aborted placenta | CA,USA | 2004 | Yes       | 8  | SRR309441<br>2 |
| ID21908     | Sheep | Abortion | Aborted placenta | ID,USA | 2005 | Yes       | 8  | SRR309442<br>1 |
| 3-A         | Sheep | Abortion | Aborted placenta | ID,USA | 2005 | Yes       | 8  | SRR309442<br>2 |
| VDL3080     | Sheep | Abortion | Aborted placenta | IA,USA | 2005 | Yes       | 8  | SRR309442<br>3 |
| SD3831      | Sheep | Abortion | Aborted placenta | SD,USA | 2005 | Yes       | 8  | SRR309442<br>4 |
| CA3         | Sheep | Abortion | Aborted placenta | CA,USA | 2005 | Yes       | 8  | SRR309442<br>5 |
| ID27313     | Sheep | Abortion | Aborted placenta | ID,USA | 2006 | Yes       | 8  | SRR309442<br>6 |
| 8-G         | Sheep | Abortion | Aborted placenta | ID,USA | 2006 | Yes       | 8  | SRR309442<br>7 |

|         |        |          |          |        |      |     |     |   |           |
|---------|--------|----------|----------|--------|------|-----|-----|---|-----------|
| ID42821 |        |          | Aborted  |        |      |     |     |   | SRR309442 |
| 1-A     | Sheep  | Abortion | placenta | ID,USA | 2006 | Yes | 8   | 6 | SRR309442 |
| ID14705 |        |          | Aborted  |        |      |     |     |   | SRR309442 |
| 2-A     | Sheep  | Abortion | placenta | ID,USA | 2007 | Yes | 8   | 7 | SRR309442 |
|         |        |          | Aborted  |        |      |     |     |   | SRR309442 |
| VDL6220 | Sheep  | Abortion | placenta | IA,USA | 2007 | Yes | 8   | 8 | SRR309442 |
|         |        |          | Aborted  |        |      |     |     |   | SRR309442 |
| ND6     | Sheep  | Abortion | placenta | ND,USA | 2007 | Yes | 8   | 9 | SRR309443 |
|         |        |          | Aborted  |        |      |     |     |   | SRR309443 |
| VDL2192 | Sheep  | Abortion | placenta | IA,USA | 2008 | Yes | 8   | 0 | SRR309443 |
|         |        |          | Aborted  |        |      |     |     |   | SRR309443 |
| VDL8958 | Sheep  | Abortion | placenta | IA,USA | 2009 | Yes | 8   | 1 | SRR309443 |
| VDL3504 |        |          | Aborted  |        |      |     |     |   | SRR309443 |
| 4       | Sheep  | Abortion | placenta | IA,USA | 2009 | Yes | 8   | 2 | SRR309443 |
|         |        |          | Aborted  |        |      |     |     |   | SRR309443 |
| VDL1957 | Sheep  | Abortion | placenta | IA,USA | 2010 | Yes | 8   | 3 | SRR309443 |
|         |        |          | Aborted  |        |      |     |     |   | SRR309443 |
| VDL2764 | Sheep  | Abortion | placenta | IA,USA | 2010 | Yes | 8   | 4 | SRR309443 |
|         |        |          | Aborted  |        |      |     |     |   | SRR309443 |
| VDL5414 | Sheep  | Abortion | placenta | IA,USA | 2011 | Yes | 8   | 5 | SRR309443 |
|         |        |          | Aborted  |        |      |     |     |   | SRR309443 |
| CO351   | Sheep  | Abortion | placenta | CO,USA | 2011 | Yes | 8   | 6 | SRR309443 |
|         |        |          | Aborted  |        |      |     |     |   | SRR309443 |
| ID33    | Sheep  | Abortion | placenta | ID,USA | 1993 | No  | 441 | 7 | SRR309444 |
|         |        |          | Aborted  |        |      |     |     |   | SRR309444 |
| CA2     | Sheep  | Abortion | placenta | CA,USA | 2003 | No  | 607 | 4 | SRR309444 |
|         |        |          | Aborted  |        |      |     |     |   | SRR309444 |
| VDL4646 | Sheep  | Abortion | placenta | IA,USA | 2004 | No  | 806 | 5 | SRR309444 |
|         |        |          | Aborted  |        |      |     |     |   | SRR309444 |
| ND7     | Sheep  | Abortion | placenta | ND,USA | 2007 | No  | 42  | 7 | SRR309444 |
|         |        |          | Aborted  |        |      |     |     |   | SRR309444 |
| ND9     | Sheep  | Abortion | placenta | ND,USA | 2008 | Yes | 8   | 8 | SRR309444 |
|         |        |          | Aborted  |        |      |     |     |   | SRR309444 |
| VDL902  | Sheep  | Abortion | placenta | IA,USA | 2008 | No  | 982 | 9 | SRR309445 |
|         |        |          | Aborted  |        |      |     | 518 |   | SRR309445 |
| VDL2019 | Sheep  | Abortion | placenta | IA,USA | 2008 | No  | 9   | 0 | SRR309445 |
|         |        |          | Aborted  |        |      |     |     |   | SRR309445 |
| VDL213  | Sheep  | Abortion | placenta | IA,USA | 2009 | No  | 806 | 1 | SRR309445 |
|         |        |          | Aborted  |        |      |     |     |   | SRR309445 |
| VDL6069 | Sheep  | Abortion | placenta | IA,USA | 2010 | No  | 38  | 3 | SRR309445 |
|         |        |          | Aborted  |        |      |     |     |   | SRR309445 |
| CA10    | Cattle | Abortion | placenta | CA,USA | 2003 | Yes | 8   | 4 | SRR309445 |
|         |        |          | Aborted  |        |      |     |     |   | SRR309445 |
| CA12    | Cattle | Abortion | placenta | CA,USA | 2003 | Yes | 8   | 5 | SRR309445 |
|         |        |          | Aborted  |        |      |     |     |   | SRR309445 |
| CA11    | Cattle | Abortion | placenta | CA,USA | 2004 | Yes | 8   | 6 | SRR309445 |
|         |        |          | Aborted  |        |      |     |     |   | SRR309445 |
| ND3     | Cattle | Abortion | placenta | ND,USA | 2005 | Yes | 8   | 7 | SRR309445 |
| VDL3124 |        |          | Aborted  |        |      |     |     |   | SRR309445 |
| 8       | Cattle | Abortion | placenta | IA,USA | 2009 | Yes | 8   | 8 | SRR309445 |
|         |        |          | Aborted  |        |      |     |     |   | SRR309445 |
| VDL2738 | Goat   | Abortion | placenta | IA,USA | 2005 | Yes | 8   | 9 | SRR309446 |
|         |        |          | Aborted  |        |      |     |     |   | SRR309446 |
| VDL1625 | Goat   | Abortion | placenta | IA,USA | 2008 | Yes | 8   | 0 | SRR309446 |
|         |        |          | Aborted  |        |      |     |     |   | SRR309446 |
| VDL4023 | Goat   | Abortion | placenta | IA,USA | 2010 | Yes | 8   | 1 | SRR309446 |

|          |       |                 |                  |        |        |     |     |   |           |
|----------|-------|-----------------|------------------|--------|--------|-----|-----|---|-----------|
| VDL4350  | Goat  | Abortion        | Aborted placenta | IA,USA | 2010   | Yes | 8   | 2 | SRR309446 |
| 1E2B2a   | Sheep |                 | Bile             | IA,USA | 2008   | Yes | 8   | 3 | SRR309446 |
| 1L1F1a   | Sheep |                 | Feces            | IA,USA | 2008   | Yes | 8   | 4 | SRR309446 |
| 2L5B2    | Sheep |                 | Bile             | IA,USA | 2008   | Yes | 8   | 5 | SRR309446 |
| 2L5B4    | Sheep |                 | Bile             | IA,USA | 2008   | Yes | 8   | 6 | SRR309446 |
| D6249    | Human | Gastroenteritis | Feces            | VT,USA | 2003   | Yes | 8   | 7 | SRR309446 |
| D7324    | Human | Gastroenteritis | Feces            | PA,USA | 2008   | Yes | 8   | 9 | SRR309447 |
| D7365    | Human | Gastroenteritis | Feces            | RI,USA | 2008   | Yes | 8   | 0 | SRR309447 |
| D8347    | Human | Gastroenteritis | Feces            | MT,USA | 2010   | Yes | 8   | 1 | SRR309447 |
| FDA17848 | Human | Gastroenteritis | Feces            | IA,USA | Unknow | Yes | 8   | 2 | SRR309447 |
| FDA17817 | Human | Gastroenteritis | Feces            | IA,USA | Unknow | Yes | 8   | 3 | SRR309447 |
| FDAN342  | Chick |                 | Meat             | MN,USA | 2004   | Yes | 8   | 5 | SRR309447 |
| UK33     | Sheep | Abortion        | Aborted placenta | UK     | 2006   | No  | 227 | 6 | SRR309447 |
| UK29     | Sheep | Abortion        | Aborted placenta | UK     | 2005   | No  | 21  | 7 | SRR309447 |
| OF48     | Sheep |                 | Feces            | IA,USA | 2006   | No  | 61  | 9 | SRR309448 |
| VDL35490 | Sheep | Abortion        | Aborted placenta | IA,USA | 2012   | No  | 982 | 0 | SRR309448 |
| VDL3452  | Sheep | Abortion        | Aborted placenta | IA,USA | 2013   | Yes | 8   | 1 | SRR309448 |
| VDL6794  | Sheep | Abortion        | Aborted placenta | IA,USA | 2013   | Yes | 8   | 2 | SRR309448 |
| UK40     | Sheep | Abortion        | Aborted placenta | UK     | 2008   | No  | 227 | 3 | SRR309448 |
| UK10     | Sheep | Abortion        | Aborted placenta | UK     | 2003   | No  | 206 | 5 | SRR309448 |
| UK32     | Sheep | Abortion        | Aborted placenta | UK     | 2006   | No  | 42  | 7 | SRR309448 |
| UK37     | Sheep | Abortion        | Aborted placenta | UK     | 2007   | No  | 270 | 8 | SRR309448 |
| ID7      | Sheep | Abortion        | Aborted placenta | ID,USA | 1992   | Yes | 8   | 9 | SRR309449 |
| ID27     | Sheep | Abortion        | Aborted placenta | ID,USA | 1993   | Yes | 8   | 0 | SRR309449 |
| ID25     | Sheep | Abortion        | Aborted placenta | ID,USA | 1993   | Yes | 21  | 1 | SRR309449 |
| SD4165   | Sheep | Abortion        | Aborted placenta | SD,USA | 2005   | Yes | 8   | 2 | SRR309449 |
| VDL2847  | Sheep | Abortion        | Aborted placenta | IA,USA | 2010   | Yes | 8   | 3 | SRR309449 |
| VDL2918  | Sheep | Abortion        | Aborted placenta | IA,USA | 2005   | Yes | 8   | 4 | SRR309449 |

|       |       |          |                     |        |      |     |   |                |
|-------|-------|----------|---------------------|--------|------|-----|---|----------------|
| 2L5F9 | Sheep |          | Feces<br>Aborted    | IA,USA | 2008 | Yes | 8 | SRR309449<br>5 |
| 302   | Sheep | Abortion | placenta<br>Aborted | IA,USA | 2014 | Yes | 8 | SRR309449<br>6 |
| 3008  | Sheep | Abortion | placenta<br>Aborted | IA,USA | 2014 | Yes | 8 | SRR309449<br>7 |
| 5406  | Sheep | Abortion | placenta            | MI,USA | 2014 | Yes | 8 | SRR309449<br>8 |

Table S3. Metadata for intestinal *Campylobacter jejuni*.

| Genome    | Collection Date | Geographic location |
|-----------|-----------------|---------------------|
| 197.14907 | 2018            | USA:PA              |
| 197.15041 | 2018            | USA:MN              |
| 197.15927 | 2016            | USA:TX              |
| 197.15936 | 2016            | USA:PA              |
| 197.15943 | 2016            | USA:TN              |
| 197.15952 | 2016            | USA:PA              |
| 197.15957 | 2016            | USA:OR              |
| 197.15958 | 2016            | USA:NE              |
| 197.15964 | 2016            | USA:ID              |
| 197.15966 | 2016            | USA:CO              |
| 197.15972 | 2016            | USA:NJ              |
| 197.15982 | 2016            | USA:TX              |
| 197.15983 | 2016            | USA:PA              |
| 197.15988 | 2016            | USA:MI              |
| 197.15993 | 2016            | USA:PA              |
| 197.15994 | 2016            | USA:MI              |
| 197.15997 | 2016            | USA:NY              |
| 197.15999 | 2016            | USA:OH              |
| 197.16001 | 2016            | USA:GA              |
| 197.16005 | 2016            | USA:OH              |
| 197.16021 | 2016            | USA:PA              |
| 197.16023 | 2016            | USA:PA              |
| 197.16031 | 2016            | USA:WI              |
| 197.16033 | 2016            | USA:CA              |
| 197.16041 | 2016            | USA:TX              |
| 197.16042 | 2016            | USA:NE              |
| 197.16048 | 2016            | USA:TX              |
| 197.16051 | 2016            | USA:WA              |
| 197.16053 | 2016            | USA:MI              |
| 197.16058 | 2016            | USA:NJ              |
| 197.16060 | 2016            | USA:WA              |
| 197.16064 | 2016            | USA:NE              |
| 197.16072 | 2016            | USA:MI              |
| 197.16074 | 2016            | USA:ID              |
| 197.16075 | 2016            | USA:MI              |
| 197.16078 | 2016            | USA:CA              |
| 197.16079 | 2016            | USA:OR              |
| 197.16084 | 2016            | USA:FL              |
| 197.16099 | 2016            | USA:NJ              |
| 197.16103 | 2016            | USA:TX              |

197.16118  
197.16127

2016 USA:WI  
2016 USA:MN

Table S4. Confusion matrix and derived model metrics for the XGboost model with extraintestinal *Campylobacter jejuni*. TP= True positive, FN= False Negative, FP= False Positive, FN= False Negative.

|                        | <b>Extraintestinal</b> | <b>Intestinal</b> |
|------------------------|------------------------|-------------------|
| <b>Extraintestinal</b> | <b>18358</b>           | <b>389964</b>     |
| <b>Intestinal</b>      | <b>6003</b>            | <b>821898</b>     |

  

| <b>Measure</b>                   | <b>Value</b> | <b>Formula</b>                                             |
|----------------------------------|--------------|------------------------------------------------------------|
| Sensitivity                      | 0.7536       | $TP / (TP + FN)$                                           |
| Specificity                      | 0.6782       | $TN / (FP + TN)$                                           |
| Precision                        | 0.045        | $TP / (TP + FP)$                                           |
| Negative Predictive Value        | 0.9927       | $TN / (TN + FN)$                                           |
| False Positive Rate              | 0.3218       | $FP / (FP + TN)$                                           |
| False Discovery Rate             | 0.955        | $FP / (FP + TP)$                                           |
| False Negative Rate              | 0.2464       | $FN / (FN + TP)$                                           |
| Accuracy                         | 0.6797       | $(TP + TN) / (P + N)$                                      |
| F1 Score                         | 0.0849       | $2TP / (2TP + FP + FN)$                                    |
| Matthews Correlation Coefficient | 0.1276       | $TP*TN - FP*FN / \sqrt{((TP+FP)*(TP+FN))*(TN+FP)*(TN+FN)}$ |





[Sensitivity](#) [Specificity](#) [Precision](#)

[Negative Predictive Value](#) [False Positive Rate](#)

[False Discovery Rate](#) [False Negative Rate](#)

[Accuracy](#)

[F1 Score](#)

[Matthews Correlation Coefficient](#)
